# Supplementary material for: Seasonal Variation in Population Abundance and Chytrid Infection in Stream-Dwelling Frogs of the Brazilian Atlantic Forest
Source: PLOS journal article supplement (doi:10.1371/journal.pone.0130554), 2015-07-10
Supplement: S1 (10.1371/journal.pone.0130554.s001) [file journal.pone.0130554.s001]

Table S1. Geographic positions and brief description of each stream transect.

| <b>Transect Name</b> | <b>Coordinates</b>               | <b>Stream description</b>                                                          |
|----------------------|----------------------------------|------------------------------------------------------------------------------------|
| ST1                  | 23° 21' 53.7" S, 44° 48' 2.8" W  | 5-10m width, steep slope<br>first 120m, many<br>waterfalls and large pools.        |
| ST2                  | 23° 21' 41.2" S, 44° 47' 15.3" W | 5-10m width, low<br>inclination, few waterfalls<br>and many large pools.           |
| ST3                  | 23° 21' 34.4" S, 44° 47' 3.2" W  | 1-5 m, relatively flat first<br>40m, and then steep slope.<br>Intermittent stream. |
| ST4                  | 23° 21' 15.2" S, 44° 46' 3.2" W  | 4-15m, relatively flat, few<br>waterfalls and many large<br>pools.                 |
